# Supplementary material for: Development and formative evaluation of the e-Health Implementation Toolkit (e-HIT)
Source: Springer Nature journal article supplement (doi:10.1186/1472-6947-10-61), 2010-10-18
Supplement: 12911_2010_362_MOESM5_ESM.pdf [file 12911_2010_362_MOESM5_ESM.pdf]

## e-Health Implementation Toolkit (e-HIT)

StartIntroductionToolkitReport

Context (1)Context (2)Context (3)InterventionWorkforce (1)Workforce (2)

|                        |                                                                                             |                                                                                        |                                                                                             |
|------------------------|---------------------------------------------------------------------------------------------|----------------------------------------------------------------------------------------|---------------------------------------------------------------------------------------------|
| <b>National policy</b> | This intervention is completely at odds with current or planned national policy.            | <br>5 | This intervention is entirely compatible with current and planned national policy.          |
|                        | <i>Add the reasons for your score and accompanying evidence here</i>                        |                                                                                        |                                                                                             |
| <b>National policy</b> | This intervention will hinder the achievement of nationally directed priorities or targets. | <br>5 | This intervention will enable the achievement of nationally directed priorities or targets. |
|                        | <i>Add the reasons for your score and accompanying evidence here</i>                        |                                                                                        |                                                                                             |
| <b>Local policy</b>    | This intervention is completely at odds with current or planned local policies.             | <br>5 | This intervention is entirely compatible with all current and planned local policies.       |
|                        | <i>Add the reasons for your score and accompanying evidence here</i>                        |                                                                                        |                                                                                             |

**Next page**
