# Supplementary figures and images for: Development and formative evaluation of the e-Health Implementation Toolkit (e-HIT)
Source: Springer Nature journal article supplement (doi:10.1186/1472-6947-10-61), 2010-10-18

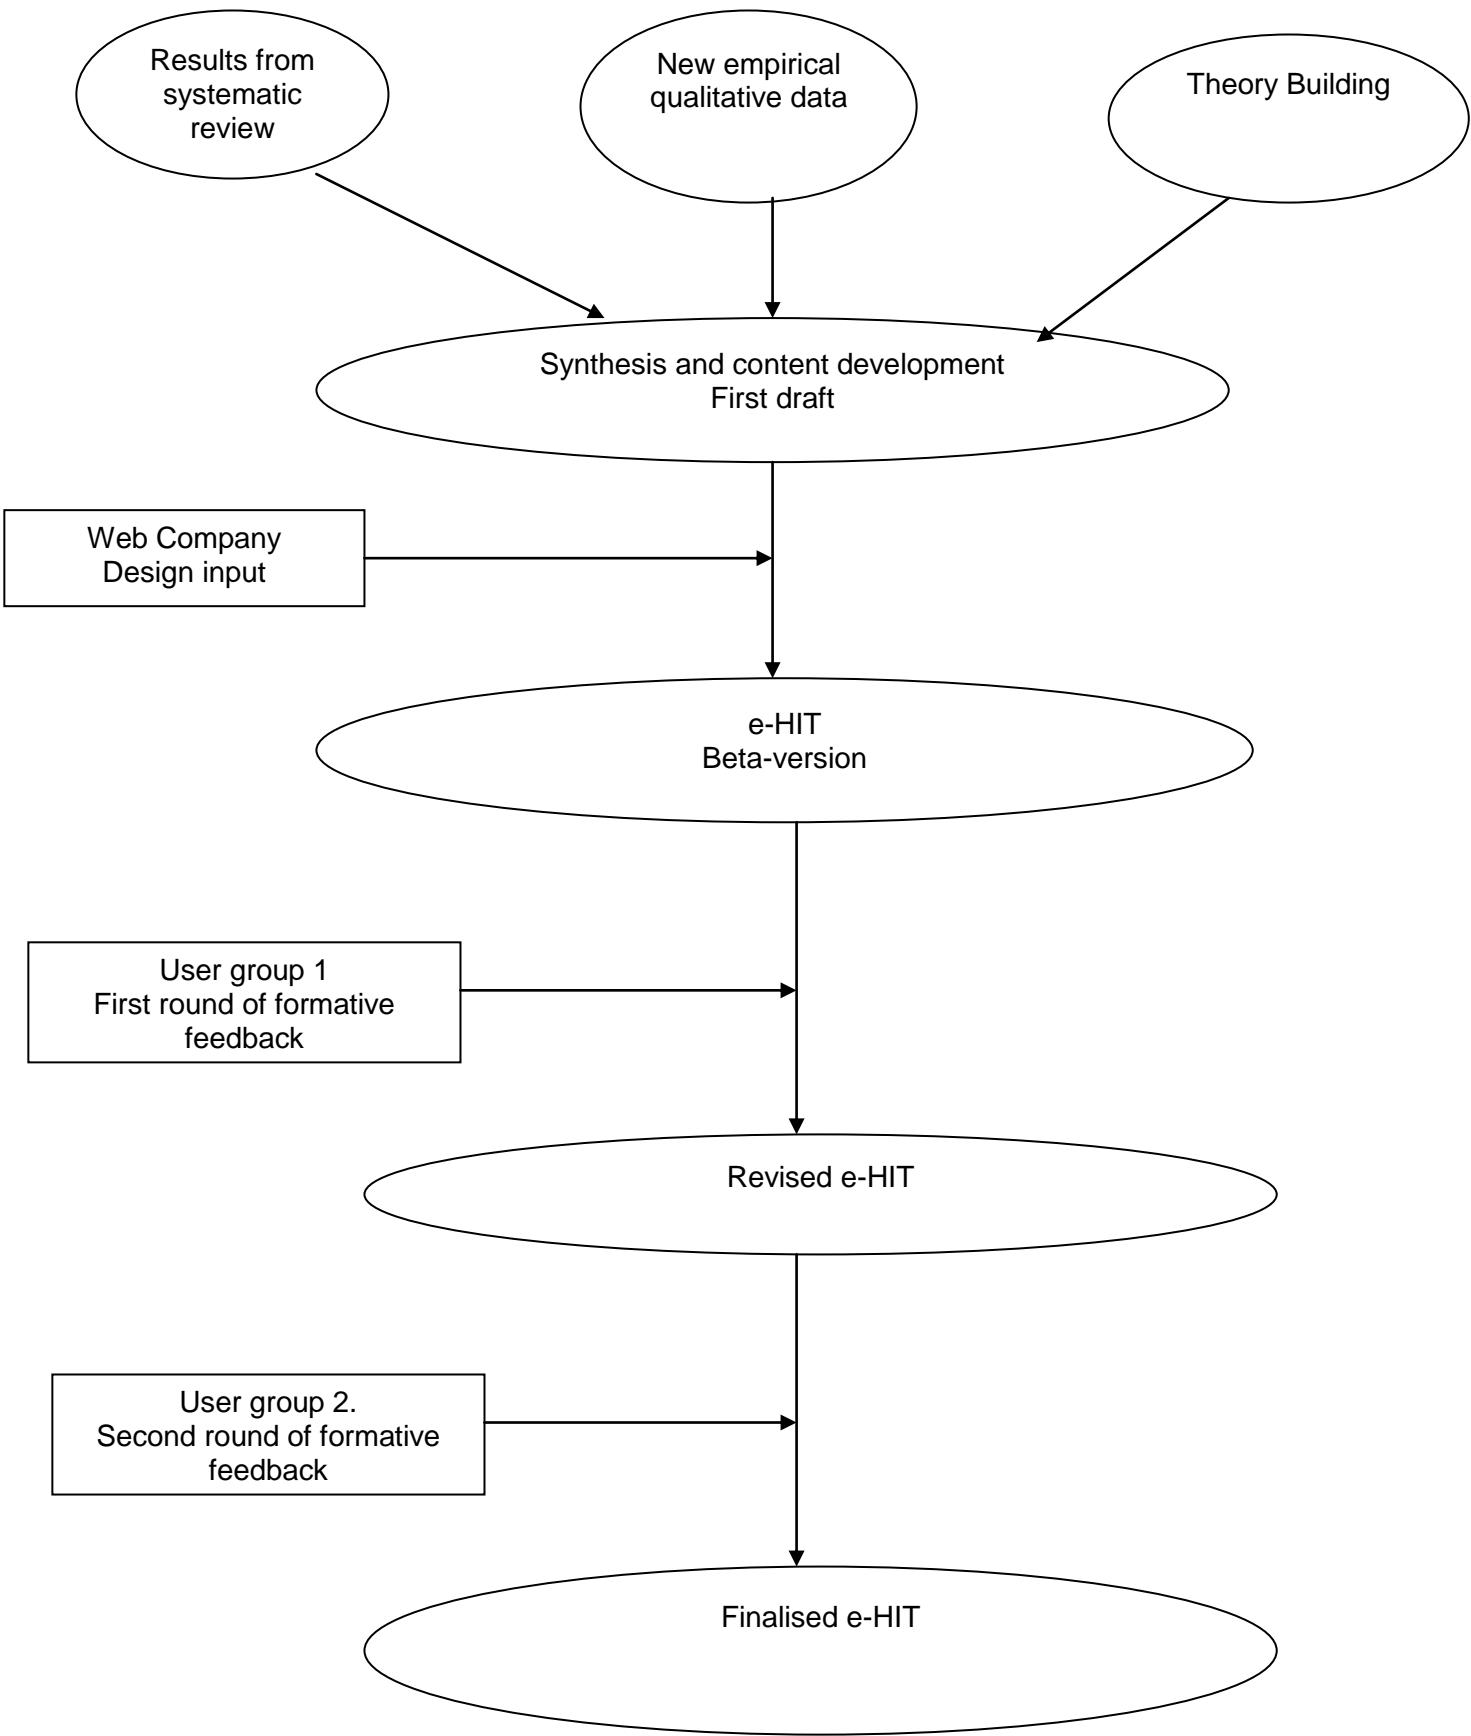

Supplement: 12911_2010_362_MOESM4_ESM.pdf [file 12911_2010_362_MOESM4_ESM.pdf]
